# Supplementary material
Source: publisher figshare collection journal article supplement (https://gsapubs.figshare.com/ndownloader/files/23300699)
Supplement: Supplementary file 1 [file 23300699]

| **­** **Sample No:** | **Latitude N deg min sec** | **Longitude E deg min sec** | **Stratigraphic**  **age** | **Stratigraphic age** | **Lithology / infered depositional environment** | **MFA** | **HM** | **DZA** |
| --- | --- | --- | --- | --- | --- | --- | --- | --- |
| 11 AM 02 | 26 22 38 | 61 26 06 | Miocene | Aquitanian- Lower Burdigalian | Medium grained sandstone with hummocky cross-bedding, deltaic | MFA | HM | DZA |
| 11 AM 04 | 26 21 47 | 61 26 17 | Miocene | Aquitanian- Burdigalian | Fine grained turbidity sandstone | MFA | HM | DZA |
| 11 AM 07 | 26 19 31 | 61 24 07 | Miocene | Aquitanian- Burdigalian | Fine grained turbidity sandstone, bioturbation | MFA | HM | DZA |
| 11 AM 08 | 26 19 25 | 61 25 07 | Miocene | Aquitanian- Burdigalian | Fine grained turbidity sandstone with flute cast | MFA | HM | DZA |
| 11 AM 10 | 26 12 59 | 61 25 35 | Miocene | Aquitanian- Lower Burdigalian | Coarse grained turbidity sandstone with flute cast | MFA | HM | DZA |
| 11 AM 12 | 26 30 49 | 61 11 14 | Oligocene | Upper Rupelian- Lower Chattian | Fine grained turbidity sandstone with flute cast | MFA |  |  |
| 11 AM 15 | 26 28 45 | 61 14 26 | Miocene | Tortonian | Medium grianed sandstone, oliststorme | MFA | HM | DZA |
| 11 AM 19 | 26 03 31 | 61 32 03 | Miocene | Upper Burdigalian | Fine grained turbidity sandstone with flute cast, alternated with bioturbated shale | MFA | HM | DZA |
| 11 AM 22 | 26 16 53 | 60 10 27 | Oligocene | Upper Rupelian- Lower Chattian | Fine grained turbidity sandstone | MFA | HM | DZA |
| 11 AM 23 | 26 31 47 | 59 57 15 | Eocene | Lutrtian- B35artonian- Priabonian | Fine grained turbidity sandstone, alternated with bioturbated shale | MFA | HM | DZA |
| 11 AM 25 | 26 29 08 | 59 59 08 | Eocene | Upper Yepresian- Lower Lutetian | Coarse grained pyroclastic sandstone, greenish |  | HM |  |
| 11 AM 26 | 26 29 17 | 59 58 45 | Eocene | Upper Yepresian- Lower Lutetian | Pyroclastic sandstone, yellowish | MFA | HM |  |
| 11 AM 27 | 26 28 13 | 60 00 09 | Oligocene | Upper Rupelian- Chattian | Coarse grained turbidity sandstone with ripple cast, alternated with bioturbated shale | MFA | HM | DZA |
| 11 AM 30 | 26 28 14 | 60.01 43 | Oligocene | Upper Rupelian- Chattian | Coarse grained sandstone, strongly weathered | MFA |  |  |
| 11 AM 32 | 26 30 59 | 59 57 31 | Eocene | Upper Yepresian- Lower Lutetian | Medium grained pyroclastic sandstone, greenish | MFA | HM | DZA |
| 11 AM 35 | 26 17 21 | 59 54 25 | Miocene | Langhian- Lower Serravallian | Medium to coarse grained sandstone, deltaic | MFA |  |  |
| 11 AM 42 | 26 03 16 | 59 40 05 | Miocene | Upper Tortonian- Lower Messinian | Medium to coarse grained sandstone, deltaic | MFA |  |  |
| 11 AM 45 | 26 19 28 | 60 23 18 | Oligocene | Chattian | Coarse grained sandstone with flute cast | MFA | HM |  |
| 11 AM 46 | 26 17 16 | 59 55 16 | Miocene | Langhian- Lower Serravallian | Coarse grained sandstone with through cross-bedding | MFA | HM | DZA |
| 11 AM 50 | 26 12 58 | 60 02 01 | Miocene | Upper Burdigalian | Medium grained sandstone with flute cast | MFA |  |  |
| 11 AM 52 | 26 15 32 | 59 56 54 | Miocene | Upper Burdigalian | Medium to coarse grained sandstone with through cross-bedding, deltaic | MFA | HM | DZA |
| 11 AM 55 | 26 07 22 | 60 57 31 | Miocene | Upper Burdigalian | Coarse grained sandstone with through cross-bedding, deltaic | MFA | HM | DZA |
| 11 AM 64 | 25 56 48 | 60 37 37 | Miocene | Langhian- Lower Serravallian | Coarse grained sandstone with flute cast, bioturbation, deltaic | MFA |  |  |
| 11 AM 71 | 25 59 52 | 59 46 26 | Miocene | Upper Tortonian- Lower Messinian | Medium grained sandstone with through cross-bedding, shelf environment | MFA | HM | DZA |
| 11 AM 77 | 26 21 52 | 61 19 13 | Miocene | Aquitanian- Burdigalian | Fine grained turbidity sandstone, alternated with bioturbated shale | MFA |  |  |
| 11 AM 86 | 26 12 50 | 61 43 17 | Miocene | Aquitanian- Lower Burdigalian | Medium grained sandstone with ripple mark and bioturbation | MFA | HM |  |
| 11 AM 91 | 26 48 51 | 61 36 07 | Eocene | Lutetian- Bartonian- Priabonian | Medium grained sandstone with ripple mark | MFA | HM | DZA |
| 12 AM 95 | 27 03 48 | 61 21 06 | Oligocene | Chattian | Fine grained turbidity sandstone with flute cast and load cast | MFA | HM | DZA |
| 12 AM 96 | 26 54 47 | 61 35 59 | Oligocene | Chattian | Medium grained turbidity sandstone with cross-bedding | MFA |  |  |
| 12 AM 106 | 27 03 41 | 61 22 58 | Oligocene | Chattian | Fine grained turbidity sandstone alternation with shale, bioturbation | MFA | HM | DZA |
| 12 AM 111 | 26 57 39 | 61 09 18 | Cretaceous | Upper Certaceous | Fine grained sandstone in imbricate zone | MFA | HM | DZA |
| 12 AM 141 | 26 01 50 | 61 30 49 | Miocene | Langhian- Lower Serravallian | Medium grained sandstone with ripple mark | MFA | HM | DZA |
| 12 AM 142 | 25 59 43 | 61 29 11 | Miocene | Langhian- Lower Serravallian | Fine grained sandstone with ripple mark | MFA | HM | DZA |
| 12 AM 145 | 25 30 26 | 59 59 48 | Miocene | Upper Tortonian- Lower Messinian | Dark colour medium grained sandstone, fossil placer on the beach |  | HM | DZA |

Table SI1. Geographical location (degree, minute, second), ages and characteristics of the analyzed samples in the Makran sandstones. Analysis key: MFA: modal framework analysis, HM: heavy minerals, DZA: detrital zircon age and Hafnium isotopes.
